# Supplementary material for: Manipulating the metal-to-insulator transitions of VO2 by combining compositing and doping strategies
Source: Royal Society of Chemistry journal article supplement (doi:10.1039/d3cp02224b), 2023-01-01
Supplement: d3cp02224b1.pdf [file d3cp02224b1.pdf]

## Manipulating the metal-to-insulator transitions of VO<sub>2</sub> by combining compositing and doping strategies

Xuanchi Zhou<sup>a†</sup>, Haifan Li<sup>a†</sup>, Yanlong Shang<sup>a</sup>, Fanqi Meng<sup>b</sup>, Ziang Li<sup>a</sup>, Kangkang Meng<sup>a</sup>, Yong  
Wu<sup>a</sup>, Xiaoguang Xu<sup>a</sup>, Yong Jiang<sup>a\*</sup>, Nuofu Chen<sup>c\*</sup>, and Jikun Chen<sup>a\*</sup>

<sup>a</sup> School of Materials Science and Engineering, University of Science and Technology Beijing,  
Beijing, 100083, China

<sup>b</sup> School of Materials Science and Engineering, Tsinghua University, Beijing 100084, China

<sup>c</sup> School of Renewable Energy, North China Electric Power University, Beijing 102206, China

\*Authors to whom correspondence should be addressed: [jikunchen@ustb.edu.cn](mailto:jikunchen@ustb.edu.cn) (J. Chen),  
[nfchen@ncepu.edu.cn](mailto:nfchen@ncepu.edu.cn) (N. Chen) and [yjiang@ustb.edu.cn](mailto:yjiang@ustb.edu.cn) (Y. Jiang).

†X. Zhou and H. Li contributed equally to this work.

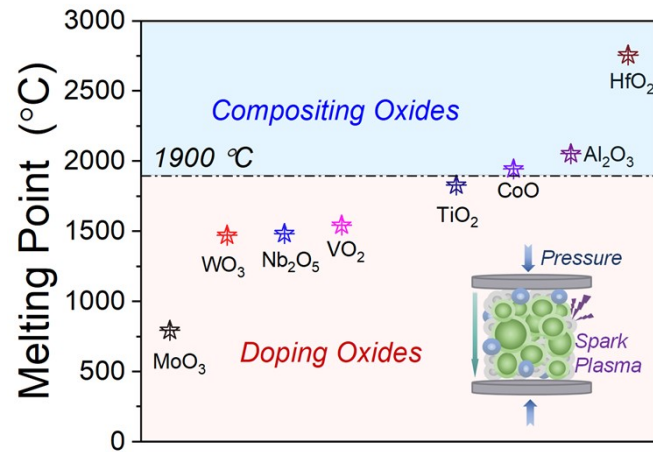

**Figure S1.** The melting points of as-used precursors oxides during the spark plasma assisted reactive sintering (SPARS) process. Substituting vanadium with doping elements can be achieved via introducing the low melting-point precursor oxides (e.g., below 1900 °C) as the dopants. In contrast, the high melting-point oxides (e.g., HfO<sub>2</sub>, CoO and Al<sub>2</sub>O<sub>3</sub>) cannot be effectively diffused into the lattice of matrix VO<sub>2</sub> within the SPARS process.

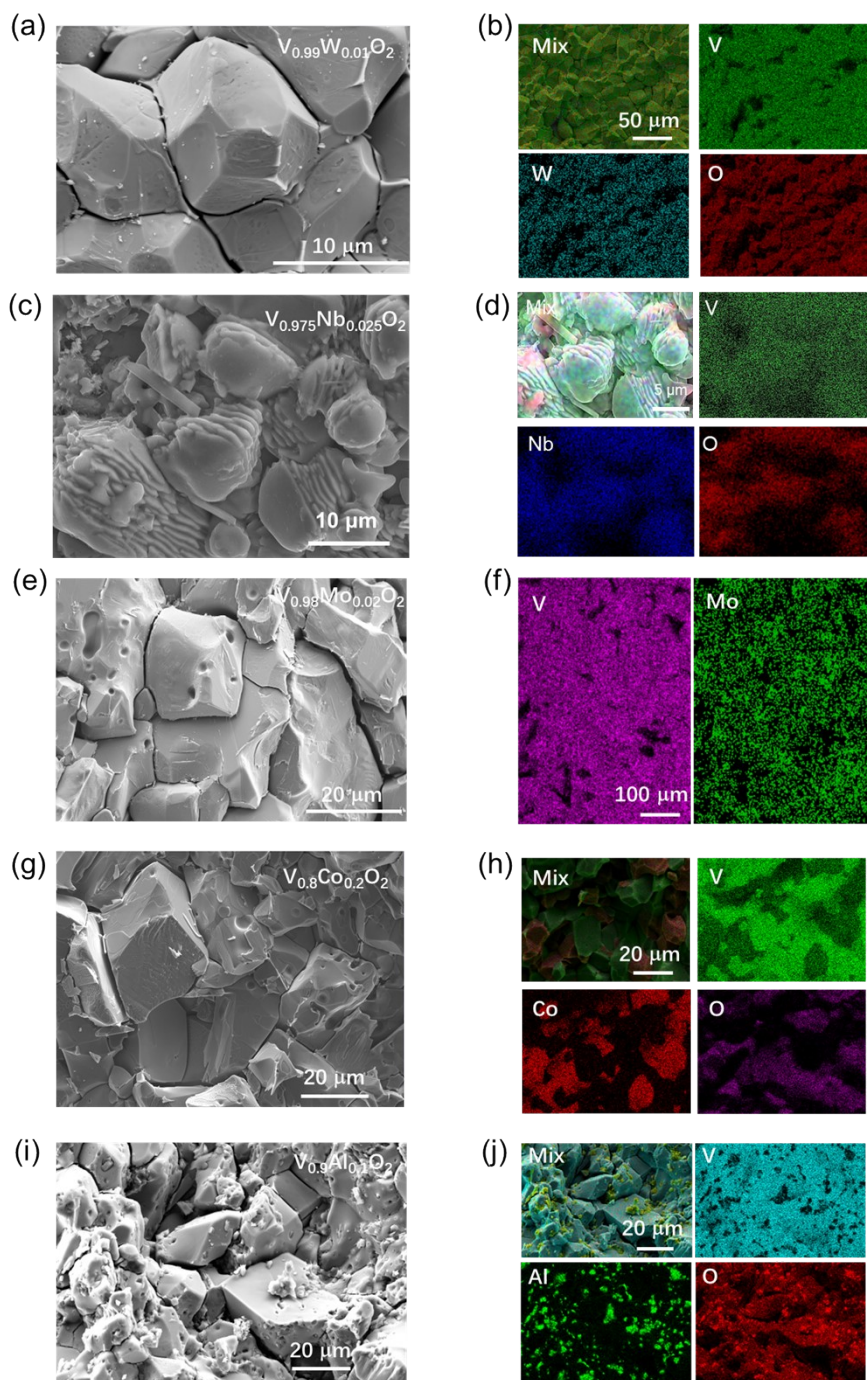

**Figure S2.** The cross-sectional surface morphologies from scanning electron microscopy (SEM) and respective elementary distributions as measured by energy dispersion spectrum (EDS) for composited VO<sub>2</sub> ceramic pellets. It can be seen that the as-sintered composited VO<sub>2</sub> ceramic pellets exhibit the polycrystallinity with a grain size of ~20 μm. In addition, the elementary distribution of compositing element is not observed for the region associated to the VO<sub>2</sub>, and this indicates the less effective diffusion of high melting-point precursors oxides within VO<sub>2</sub> during the speak plasma assisted sintering process.

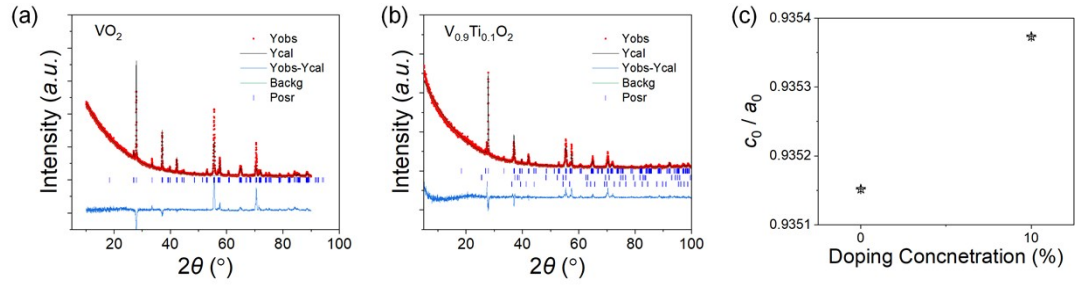

**Figure S3.** The Rietveld refinement of the X-ray diffraction (XRD) patterns of as-made (a) pristine VO<sub>2</sub>, (b) V<sub>0.9</sub>Ti<sub>0.1</sub>O<sub>2</sub> ceramic pellets. (c) The ratio of the lattice constants (e.g.,  $c_0/a_0$ ) for Ti-doped VO<sub>2</sub> pellets plotted as a function of doping concentration. It can be seen that the enlarged magnitude of  $c_0/a_0$  observed for V<sub>0.9</sub>Ti<sub>0.1</sub>O<sub>2</sub> sample indicates the local structural distortion upon Ti substitution, similar to the previous report [1].

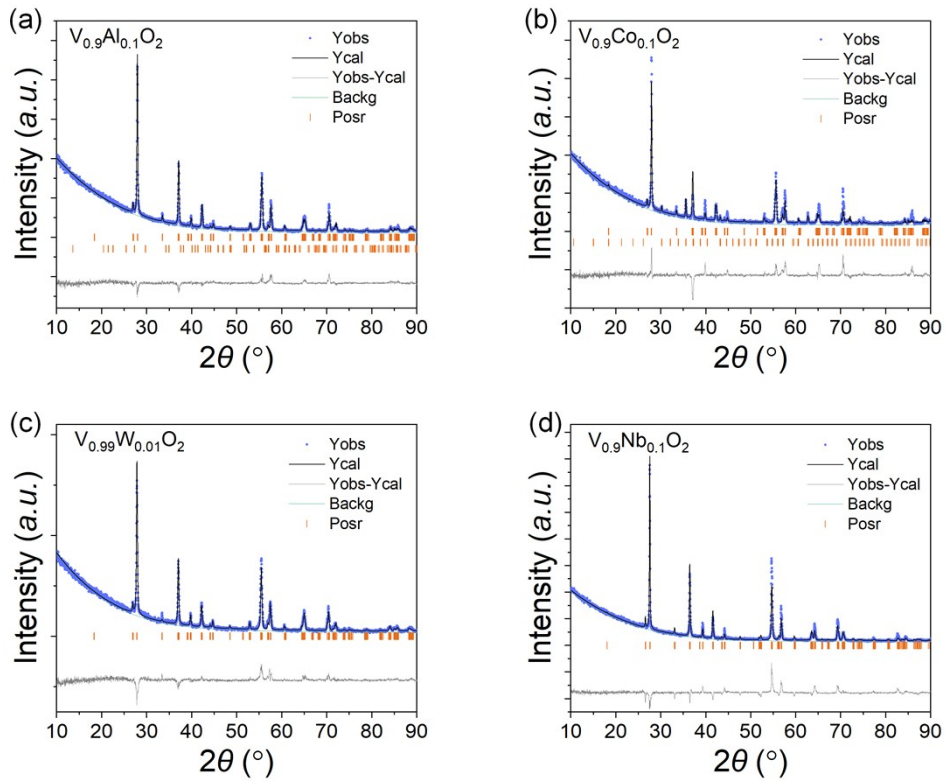

**Figure S4.** The Rietveld refinement of the X-ray diffraction (XRD) patterns of as-made (a)  $V_{0.9}Al_{0.1}O_2$ , (b)  $V_{0.9}Co_{0.1}O_2$ , (c)  $V_{0.99}W_{0.01}O_2$  and (d)  $V_{0.9}Nb_{0.1}O_2$  ceramic pellets. In general, the doped  $VO_2$  ceramic pellets exhibit the same crystal structure to matrix  $VO_2$  (M), while in contrast the peaks associated to precursor oxides with high melting point are clearly observed for composited  $VO_2$  samples.

**Table S1** Actual elementary concentration of as-made doped or composited VO<sub>2</sub> pellets.

| Sample                                               | Nominal concentration of vanadium (%) | Nominal concentration of doping elements (%) | Actual concentration of vanadium (%) | Actual concentration of doping elements (%) |
|------------------------------------------------------|---------------------------------------|----------------------------------------------|--------------------------------------|---------------------------------------------|
| V <sub>0.99</sub> W <sub>0.01</sub> O <sub>2</sub>   | 99                                    | 1                                            | 99.09                                | 0.91                                        |
| V <sub>0.995</sub> W <sub>0.005</sub> O <sub>2</sub> | 99.5                                  | 0.5                                          | 99.56                                | 0.44                                        |
| V <sub>0.9</sub> Ti <sub>0.1</sub> O <sub>2</sub>    | 90                                    | 10                                           | 89.86                                | 10.14                                       |
| V <sub>0.8</sub> Hf <sub>0.2</sub> O <sub>2</sub>    | 80                                    | 20                                           | 80.22                                | 19.78                                       |

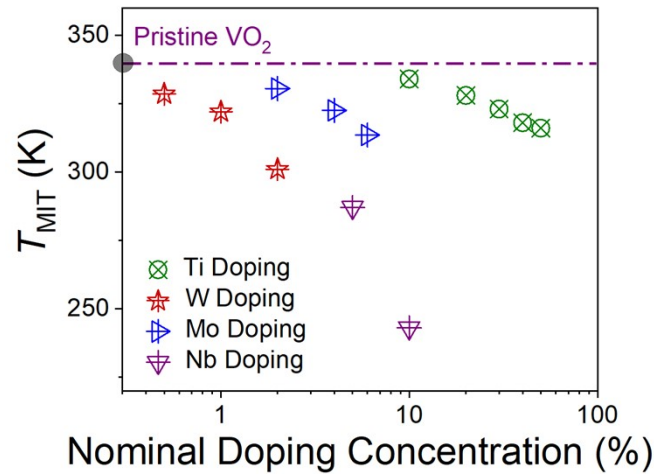

**Figure S5.** The transition temperature (e.g.,  $T_{MIT}$ ) of as-made doped  $VO_2$  pellets (e.g.,  $W^{6+}$ ,  $Mo^{6+}$ ,  $Nb^{5+}$  and  $Ti^{4+}$ ) plotted as a function of the nominal doping concentration. It can be seen that the  $T_{MIT}$  for as-made doped  $VO_2$  pellets (e.g.,  $W^{6+}$ ,  $Mo^{6+}$ ,  $Nb^{5+}$  and  $Ti^{4+}$ ) almost linearly reduces with an increasing doping concentration.

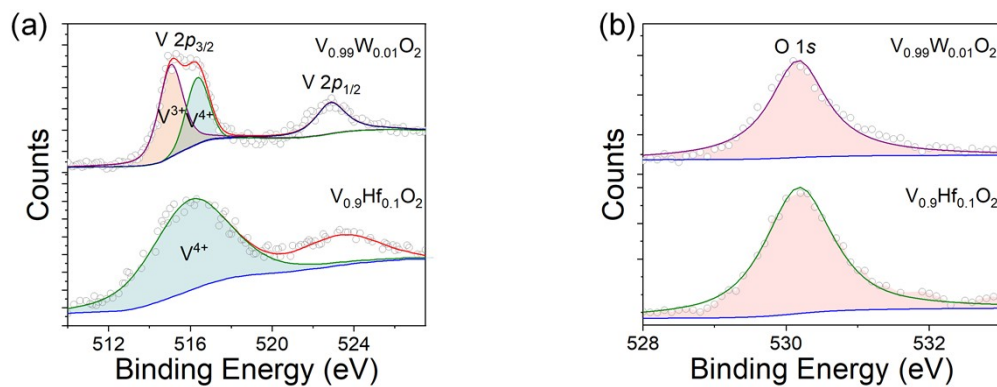

**Figure S6.** X-ray photoemission spectroscopy (XPS) analysis of (a) V and (b) O peaks as compared for  $V_{0.99}W_{0.01}O_2$  and  $V_{0.9}Hf_{0.1}O_2$  ceramic pellets. It can be seen that the valence state of vanadium is observed to be reduced towards +3 via W substitution, while the vanadium valence state of  $V_{0.9}Hf_{0.1}O_2$  remains the same as +4. In addition, the main presence of lattice oxygen is observed for the O 1s peak of as-made  $V_{0.99}W_{0.01}O_2$  and  $V_{0.9}Hf_{0.1}O_2$  pellets. It is worthy to note that as-observed variations in the valence state of vanadium is in general consistency with the observations for their MIT functionalities.



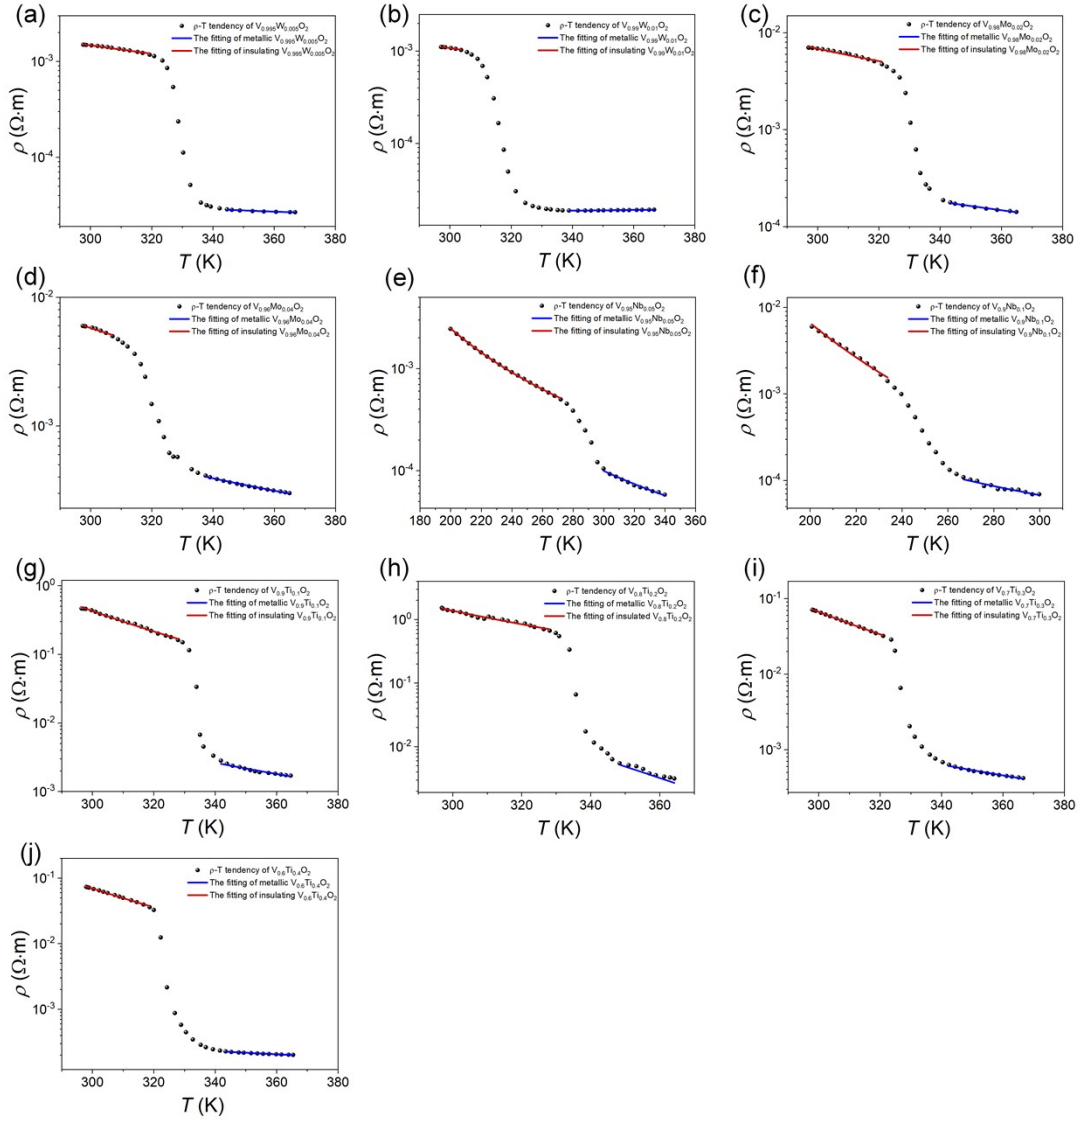

**Figure S7.** Fitting both the insulating and metallic phases for as-made doped  $VO_2$  ceramic pellets (e.g.,  $W^{6+}$ ,  $Nb^{5+}$ ,  $Mo^{6+}$  and  $Ti^{4+}$  doped) via the carrier hopping and two-phase models, respectively.

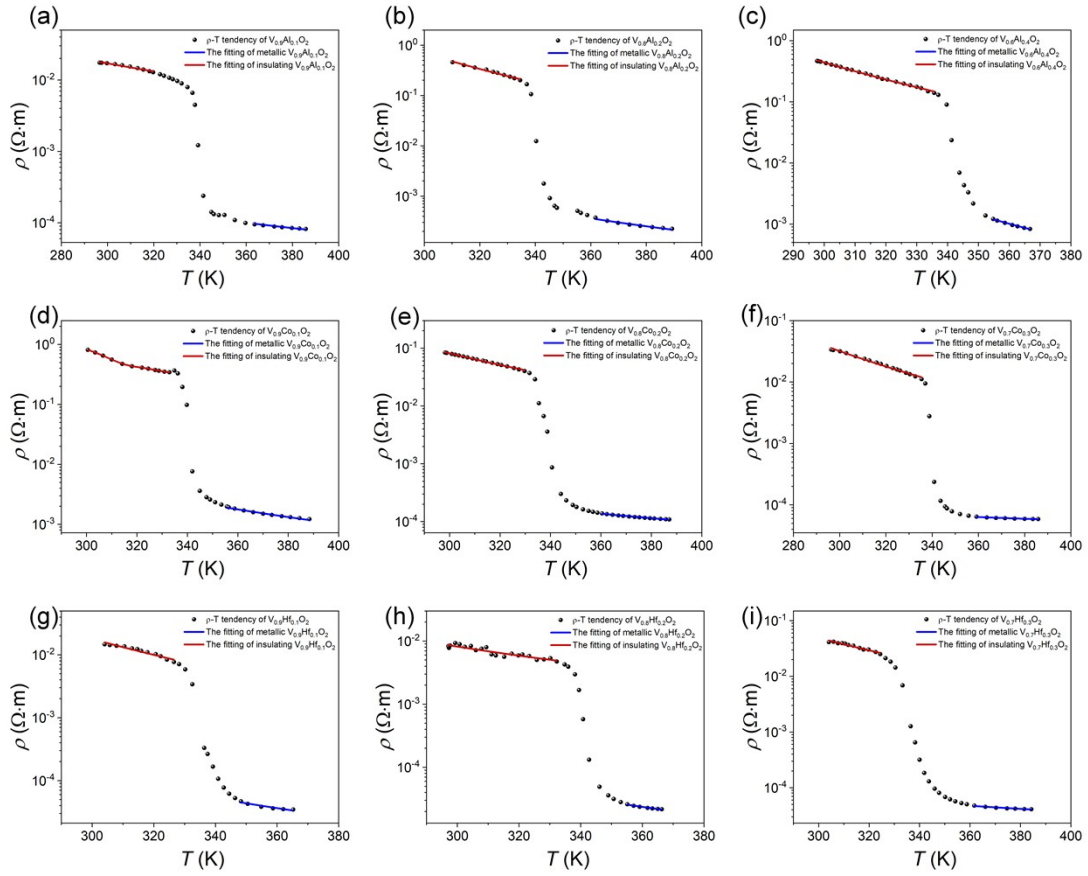

**Figure S8.** Fitting both the insulating and metallic phases for as-made composited  $VO_2$  ceramic pellets (e.g.,  $HfO_2$ ,  $CoO$  and  $Al_2O_3$  composited) via the carrier hopping and two-phase models, respectively.

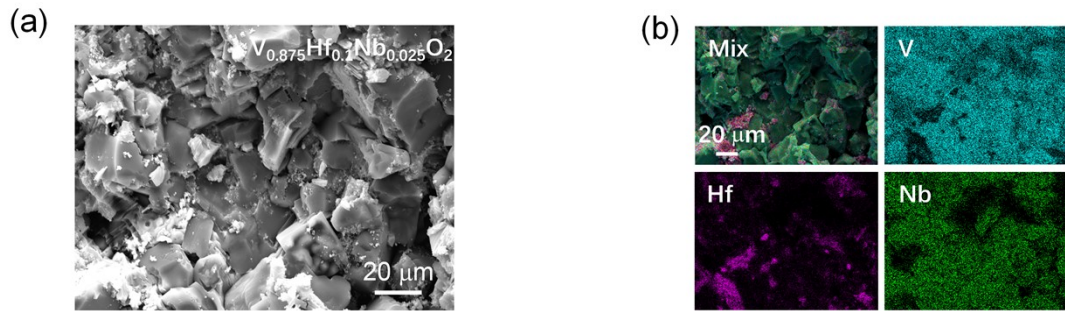

**Figure S9.** The cross-sectional surface morphology from scanning electron microscopy (SEM) and respective elementary distributions as measured by energy dispersion spectrum (EDS) mapping for co-doped VO<sub>2</sub> ceramic pellets. It can be seen that the same distribution is observed for substituted Nb and V elements, while the composited Hf element is not observed for the region of V element, indicating a successful fabrication of the co-doped ceramic pellet.

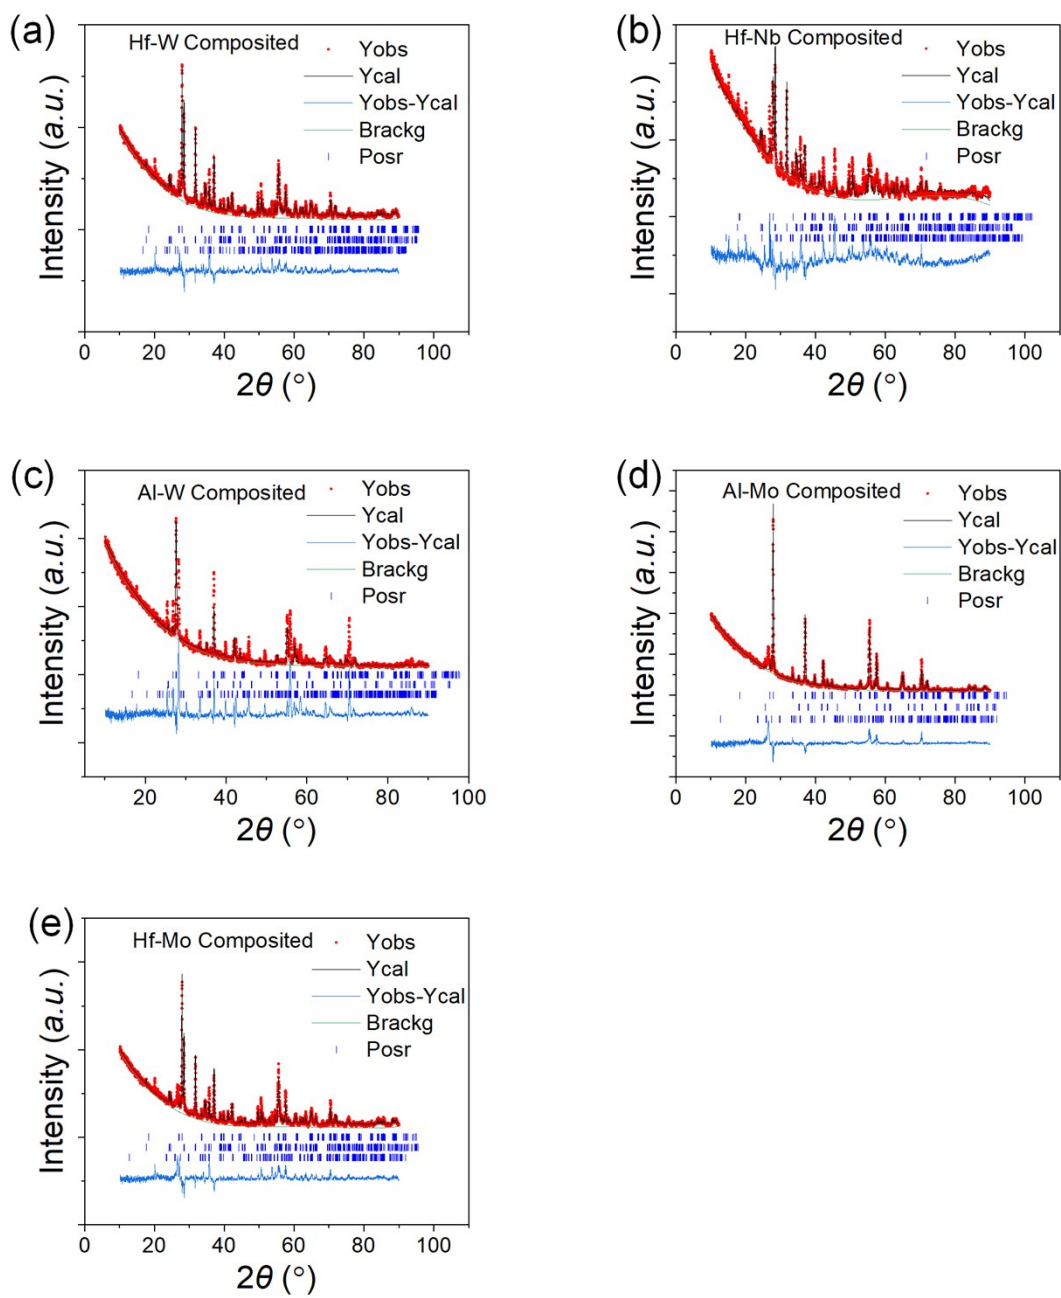

**Figure S10.** The Rietveld refinement of the X-ray diffraction (XRD) patterns of co-doped ceramic pellets.

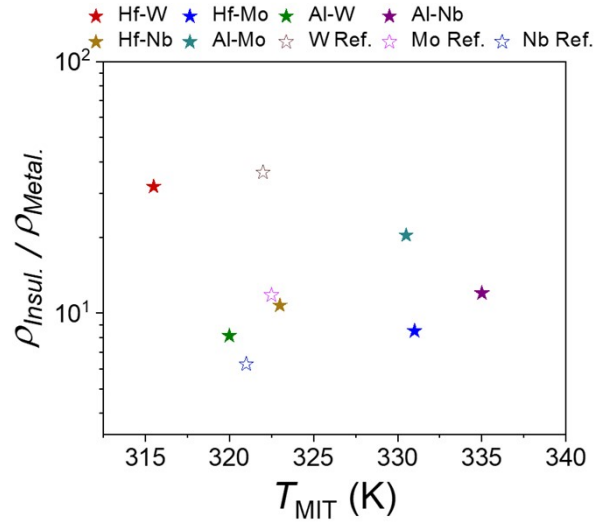

**Figure S11.** Transition sharpness (e.g.,  $\rho_{Insul.}/\rho_{Metal.}$ ) plotted as a function of the transition temperature ( $T_{MIT}$ ) for as-made composited or doped  $VO_2$ , as compared with the previously reported one [2]. It can be seen that the  $T_{MIT}$  of co-doped ceramic pellet is reduced towards low temperature, owing to electron doping, while their respective transition sharpness is comparable to the ones for high-valence doped  $VO_2$ .

## References

- [1] C.N.R. Rao, M. Natarajan, G.V. Subba Rao, R.E. Loehman, Phase transitions and conductivity anomalies in solid solutions of VO<sub>2</sub> with TiO<sub>2</sub>, NbO<sub>2</sub>, and MoO<sub>2</sub>, *J. Phys. Chem. Solids.* 32 (1971) 1147-1150.
- [2] X. Zhou, Y. Cui, Y. Shang, H. Li, J. Wang, Y. Meng, X. Xu, Y. Jiang, N. Chen, J. Chen, Non-equilibrium Spark Plasma Reactive Doping Enables Highly Adjustable Metal-to-Insulator Transitions and Improved Mechanical Stability for VO<sub>2</sub>, *J. Phys. Chem. C.* 127 (2023) 2639-2647.
